# Supplementary material for: Poly(vinylidene fluoride)-based hybrid gel polymer electrolytes for additive-free lithium sulfur batteries
Source: Royal Society of Chemistry journal article supplement (doi:10.1039/c7ta05145j), 2017-01-01
Supplement: c7ta05145j1.pdf [file c7ta05145j1.pdf]

## Supporting Information

### Polyvinylidene Fluoride Based Hybrid Gel Polymer Electrolytes for Additive-free Lithium Sulfur Batteries

Shu Gao<sup>b</sup>, Kangli Wang<sup>a,\*</sup>, Ruxing Wang<sup>b</sup>, Mao Jiang<sup>b</sup>, Jing Han<sup>b</sup>, Tiantian Gu<sup>b</sup>,  
Shijie Cheng<sup>a</sup>, Kai Jiang<sup>a,b,\*</sup>

<sup>a</sup> State Key Laboratory of Advanced Electromagnetic Engineering and Technology, School of Electrical and Electronic Engineering, Huazhong University of Science and Technology, Wuhan, Hubei 430074, China

<sup>b</sup> State Key Laboratory of Materials Processing and Die & Mould Technology, School of Materials Science and Engineering, Huazhong University of Science and Technology, Wuhan, Hubei 430074, China

\* Corresponding author. E-mail: [kjiang@hust.edu.cn](mailto:kjiang@hust.edu.cn), [klwang@hust.edu.cn](mailto:klwang@hust.edu.cn); Tel. and Fax: 86-(27)87559524.

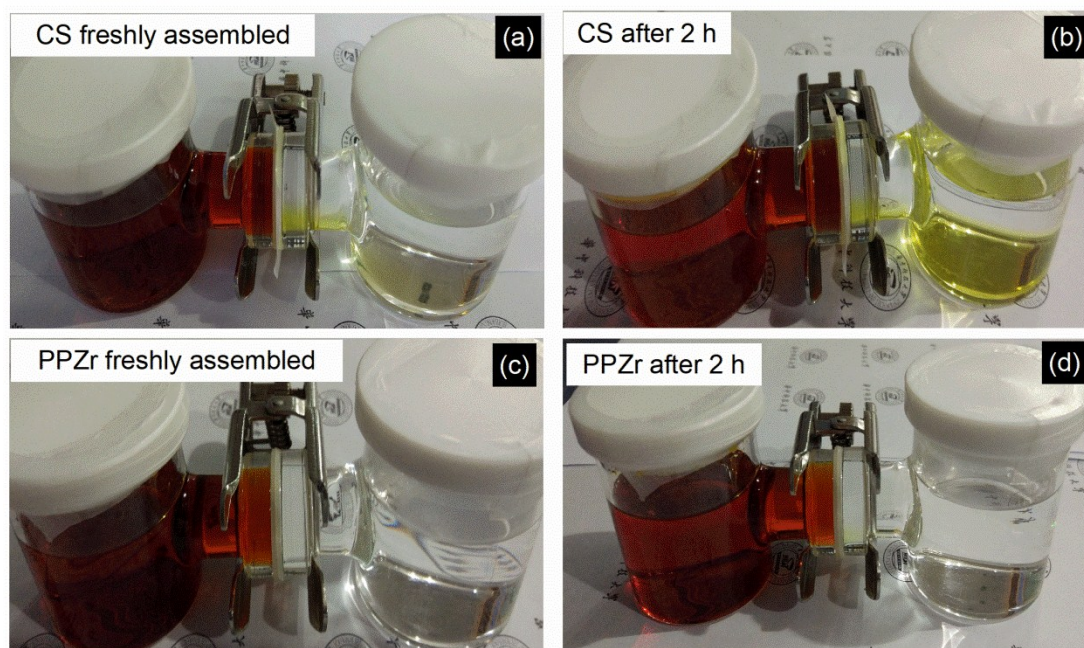

Fig. S1. The comparison of the blocking ability towards polysulfide between the CS and PPZr membrane.
